# Supplementary material for: Trap column-based intact mass spectrometry for rapid and accurate evaluation of protein molecular weight
Source: Royal Society of Chemistry journal article supplement (doi:10.1039/d2ra00429a), 2022-01-01
Supplement: d2ra00429a1.zip [file d2ra00429a1.zip]

**Supplementary Figure 1.** Schematic diagram of LC-MS.

**Supplementary Figure 2.** MS spectrum (A-D) and deconvolution (E-H) results of commercial recombinant TNF dissolved in several concentrations of Tris-HCl.

**Supplementary Figure 3.** MS spectrum (A-F) and deconvolution (G-L) results of commercial recombinant TNF dissolved in PBS with 0, 10, 20, 30, 40, or 50% glycerol.
