# Supplementary material for: Trap column-based intact mass spectrometry for rapid and accurate evaluation of protein molecular weight
Source: Royal Society of Chemistry journal article supplement (doi:10.1039/d2ra00429a), 2022-01-01
Supplement: d2ra00429a2.zip [file d2ra00429a2.zip]

File: D:\2020GYUMIN.PRO\ACQUDB\210607 waters.ipr

Printed: Tuesday, June 29, 2021 15:38:07 Korea Standard Time

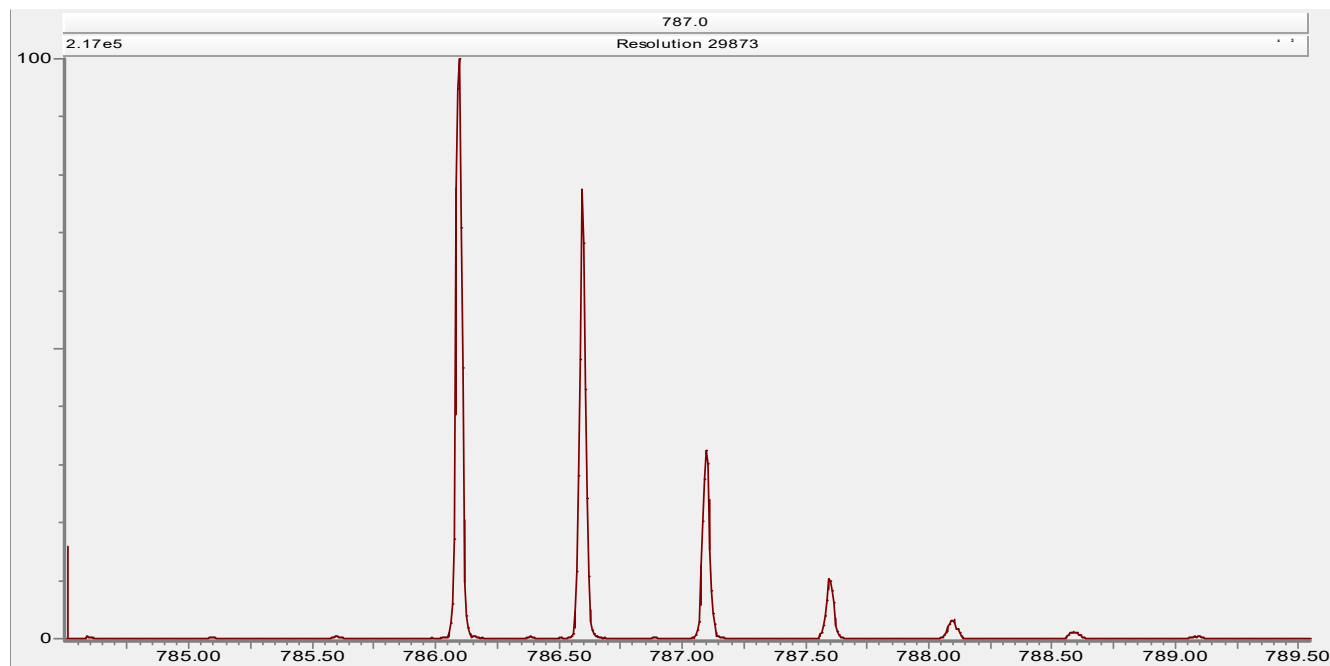**Source (ES+, Sensitivity mode)**

|                              |         |
|------------------------------|---------|
| Capillary (kV)               | 3.0000  |
| Sampling Cone                | 30.0000 |
| Source Temperature (°C)      | 120     |
| Source Offset                | 80      |
| Desolvation Temperature (°C) | 250     |
| Cone Gas Flow (L/Hr)         | 50.0    |
| Nanoflow Gas Pressure (Bar)  | 1.0     |
| Desolvation Gas Flow (L/Hr)  | 600.0   |

**Instrument**

|                         |       |
|-------------------------|-------|
| LM Resolution           | 4.7   |
| HM Resolution           | 15.0  |
| Aperture 1              | 0.0   |
| Pre-filter              | 2.0   |
| Ion Energy              | 0.0   |
| Manual Collision Energy | FALSE |
| Collision Energy        | 6.0   |
| Detector                | 2150  |
| DetectorCache           | 0     |

**Sample Fluidics**

The settings for the fluidics are not saved as part of the parameter file.  
Refer to the current tune page, console or acquisition record for their actual values.

**System 1**

|               |        |
|---------------|--------|
| Focus2        | 41.0   |
| Acceleration1 | 20.0   |
| Acceleration2 | 90.0   |
| Aperture2     | 30.0   |
| Transport1    | 30.0   |
| Transport2    | 30.0   |
| Steering      | 0.01   |
| Tube Lens     | 15     |
| Pusher        | 1900.0 |
| Pusher Offset | -0.53  |
| Puller        | 1400.0 |

**System 2**

|                        |           |
|------------------------|-----------|
| Pusher Cycle Time (μs) | Automatic |
| Pusher Width (μs)      | Automatic |
| Collector              | 60        |
| Collector Pulse        | 10.0      |
| Stopper                | 10        |
| Stopper Pulse          | 20.0      |
| Entrance               | 17        |
| Static Offset          | 120       |
| Puller Offset          | 0.00      |

**Settings**

|                      |       |
|----------------------|-------|
| Reflectron Grid (kV) | 1.707 |
| Flight Tube (kV)     | 9.00  |
| Reflectron (kV)      | 1.602 |

**T-Wave**

|                          |        |
|--------------------------|--------|
| TWave Entrance           | 2.00   |
| Static Offset            | 120.00 |
| TWave Exit               | 15.00  |
| TWave Trap Height        | 4.00   |
| TWave Extract Height     | 15.00  |
| Trap Wave Velocity (m/s) | 260    |
| Trap Wave Height (V)     | 0.2    |
| Cell 2 Gradient          | 1      |
| Cell2 Offset B           | 0      |
| Cell2 Offset C           | 1      |

**Vacuum (mbar)**

|           |         |
|-----------|---------|
| Backing   | 3.17e0  |
| Collision | 6.69e-3 |
| TOF       | 6.68e-7 |

**RF Parameters**

|                           |        |
|---------------------------|--------|
| Collision RF Offset       | 600    |
| Collision RF Initial      | 50     |
| Collision RF Final        | 150    |
| MS Profile Type           | Auto P |
| MSProfileMass1            | 100    |
| MSProfileDwellTime1       | 20     |
| MSProfileRampTime1        | 20     |
| MSProfileMass2            | 300    |
| MSProfileDwellTime2       | 20     |
| MSProfileRampTime2        | 40     |
| MSProfileMass3            | 500    |
| Use Automatic RF Settings | TRUE   |
| AutoStepWave1RFOffset     | 300    |
| AutoStepWave2RFOffset     | 350    |

**ADC Parameters**

|                              |           |
|------------------------------|-----------|
| Lteff                        | 1800.0    |
| Veff                         | 6335.50   |
| Resolution                   | 22000     |
| Min Points in Peak           | 2         |
| Acquisition Device           | WatersADC |
| ADC Trigger Threshold (V)    | 1.00      |
| ADC Input Offset (V)         | -1.68     |
| Average Single Ion Intensity | 37        |
| ADC Amplitude Threshold      | 3         |
| ADC Centroid Threshold       | -1        |
| ADC Ion Area Threshold       | 3         |

File: D:\2020GYUMIN.PRO\ACQUDB\210607 waters.ipr

Printed: Tuesday, June 29, 2021 15:38:07 Korea Standard Time

---

|                                     |        |
|-------------------------------------|--------|
| ADC Ion Area Offset                 | 15     |
| ADC Pushes Per IMS Increment        | 1      |
| TargetEnhancement Delay Coefficient | 2.1500 |
| TargetEnhancement Delay Offset      | 0.0000 |
