# Supplementary material for: Trap column-based intact mass spectrometry for rapid and accurate evaluation of protein molecular weight
Source: Royal Society of Chemistry journal article supplement (doi:10.1039/d2ra00429a), 2022-01-01
Supplement: d2ra00429a2.zip [file d2ra00429a2.zip]

Method File: d:\2020gyumin.pro\acqddb\210715\_intactmass\_10min\_lcmethod\_standard\_partialloop  
Last Modified: Wednesday, December 01, 2021 14:50:38 Korea Standard Time

Printed: Thursday, December 30, 2021 16:09:04 Korea Standard Time

### Waters GI Pump Method

1 -----  
Binary Solvent Manager  
Application Mode: Direct Injection  
Pump Type: BSM1  
Run Time: 10.00 min  
Solvent Selection A: A1  
Solvent Selection B: B1  
Seal Wash: 30.0 min  
Switch 1: No Change  
Switch 2: No Change  
Switch 3: No Change  
Chart Out 1: System Pressure  
Chart Out 2: %B  
Run Events: No  
[Analytical Gradient Table]  
Time(min) Flow Rate(uL/min) %A %B Curve  
1. Initial 1.000 50.0 50.0  
2. 10.00 1.000 50.0 50.0 6  
Analytical Low Pressure Limit: 0 psi  
Analytical High Pressure Limit: 10000 psi  
Solvent Name A: Water  
Solvent Name B: Acetonitrile  
Comment:  
System Pressure Data Channel: Yes  
Flow Rate Data Channel: Yes  
%A Data Channel: Yes  
%B Data Channel: Yes  
Primary A Pressure Data Channel: No  
Accumulator A Pressure Data Channel: No  
Primary B Pressure Data Channel: No  
Accumulator B Pressure Data Channel: No  
Degasser Pressure Data Channel: No  
[Trapping Gradient Table]  
Time(min) Flow Rate(uL/min) %A %B Curve  
1. Initial 5.000 99.0 1.0  
2. 3.00 5.000 99.0 1.0 6  
Percentage of first solvent(B): 100.0  
Percentage of first solvent(A): 100.0  
Used for Load Ahead: No  
Sample Loading Time: 3.00 min  
Trapping Pump: No  
Disable Flow Ramps: No  
SM Multiload: No

4 -----  
Trap Valve Manager  
Run Time: 10.00 min  
ApplicationMode: ApplicationMode\_1  
Comment:  
Analytical Left Valve Position: No Change  
Analytical Right Valve Position: Position 1  
Trapping Left Valve Position: No Change  
Trapping Right Valve Position: Position 2  
Target Column Temperature: 40.0 C  
Target CM-Aux A Upper Temperature: Off C  
Target CM-Aux A Lower Temperature: Off C  
Target CM-Aux B Upper Temperature: Off C  
Target CM-Aux B Lower Temperature: Off C  
Temperature Alarm Band: 10.0 C  
Left Valve Position Data Channel: No  
Right Valve Position Data Channel: No  
Column Temperature Data Channel: Yes  
CM-Aux A Upper Temperature Data Channel: No  
CM-Aux A Lower Temperature Data Channel: No  
CM-Aux B Upper Temperature Data Channel: No  
CM-Aux B Lower Temperature Data Channel: No

Method File: d:\2020gyumin.pro\acqddb\210715\_intactmass\_10min\_lcmethod\_standard\_partialloop  
Last Modified: Wednesday, December 01, 2021 14:50:38 Korea Standard Time

Printed: Thursday, December 30, 2021 16:09:05 Korea Standard Time

---

Method Comments...

Comment:

#### Waters Acquity Autosampler Method

Run Time: 10.00 min

Comment:

Load Ahead: Disabled

Injection Mode: Partial Loop

Loop Offline: Disable

Weak Wash Solvent Name: Water

Weak Wash Volume: 600 uL

Strong Wash Solvent Name: Acetonitrile

Strong Wash Volume: 200 uL

Target Column Temperature: Off C

Column Temperature Alarm Band: Disabled

Target Sample Temperature: 8.0 C

Sample Temperature Alarm Band: Disabled

Full Loop Overfill Factor: Automatic

Syringe Draw Rate: Automatic

Needle Placement: Automatic

Pre-Aspirate Air Gap: Automatic

Post-Aspirate Air Gap: Automatic

Column Temperature Data Channel: No

Ambient Temperature Data Channel: Yes

Sample Temperature Data Channel: Yes

Sample Organizer Temperature Data Channel: No

Sample Pressure Data Channel: No

Switch 1: No Change

Switch 2: No Change

Switch 3: No Change

Switch 4: No Change

Chart Out: Sample Pressure

Sample Temp Alarm: Disabled

Column Temp Alarm: Disabled

Run Events: No

Needle Overfill Flush: Automatic

No Injection: Disabled

iKey Cool Down: 2.0

End Of Report
