# Supplementary material for: Trap column-based intact mass spectrometry for rapid and accurate evaluation of protein molecular weight
Source: Royal Society of Chemistry journal article supplement (doi:10.1039/d2ra00429a), 2022-01-01
Supplement: d2ra00429a2.zip [file d2ra00429a2.zip]

File: d:\2020gyumin.pro\acqddb\210601\_inatactmass\_sensitivitymode.exp

Printed: Thursday, December 30, 2021 16:10:17 Korea Standard Time

|                       |                                                                 |
|-----------------------|-----------------------------------------------------------------|
| Name                  | d:\2020gyumin.pro\acqddb\210601_inatactmass_sensitivitymode.exp |
| Creation Time         | Mon 05 Jul 2021 09:03:22                                        |
| Instrument Identifier | XEVO-G2XSQTOF#NotSet                                            |
| Version Number        | 1.0                                                             |
| Duration (min)        | 10.0                                                            |
| Calibration Filename  | C:\MassLynx\IntelliStart\Results\211029_gfp_cal-1.cal           |
| Number Of Functions   | 1                                                               |

**Function 1 : ToF MS, Time 0.00 to 10.00, Mass 500.00 to 4000.00 ES+**

|                                           |                  |
|-------------------------------------------|------------------|
| Scan Time (sec)                           | 0.500            |
| Interscan Time (sec)                      | 0.100            |
| Start Mass                                | 500.0            |
| End Mass                                  | 4000.0           |
| Start Time (mins)                         | 0.00             |
| End Time (mins)                           | 10.00            |
| Data Format                               | Continuum        |
| ADC Pusher Frequency (μs)                 | 100.0            |
| ADC Pusher Width (μs)                     | 4.00             |
| Use Tune Page Cone Voltage                | YES              |
| Using Auto Transfer Collision Energy (eV) | 6.000000         |
| Sensitivity                               | Normal           |
| Dynamic Range                             | Normal           |
| Save Collapsed Retention Time Data        | No               |
| Use Rule File Filtering                   | No               |
| [LOCK SPRAY]                              |                  |
| LockSprayType:                            | Apply Correction |
| LockSpray Reference Compound Name:        | 200612_GFP       |
| Scan Time (sec)                           | 1.00             |
| Interval                                  | 300              |
| TargetEnhancement Mass                    | 0.0000           |
| Mass Window +/-                           | 0.5              |
| Scans to Average                          | 3.0              |
| Reference Cone Voltage                    | 30.0             |
| Collision Energy (eV)                     | 6.0              |
| LocksprayDRESetting                       | 99.9000          |
| Lock Mass                                 | 785.842600       |
| Mass Window +/-                           | 0.5              |
| Scans to Average                          | 3.0              |
| UseSONARMode                              | FALSE            |
| SONARQuadrupoleStartMass                  | 100.0            |
| SONARQuadrupoleStopMass                   | 1000.0           |
| SONARQuadrupolePeakWidth                  | 20               |
