# Supplementary material for: Trap column-based intact mass spectrometry for rapid and accurate evaluation of protein molecular weight
Source: Royal Society of Chemistry journal article supplement (doi:10.1039/d2ra00429a), 2022-01-01
Supplement: d2ra00429a2.zip [file d2ra00429a2.zip]

Method File: D:\2020GYUMIN.PRO\Acqudb\210808\_trap  
Last Modified: Sunday, August 08, 2021 13:22:27 Korea Standard Time

Printed: Thursday, December 30, 2021 16:30:52 Korea Standard Time

### Waters GI Pump Method

1 -----  
Binary Solvent Manager  
Application Mode: Trapping  
Pump Type: BSM1  
Run Time: 5.00 min  
Solvent Selection A: A1  
Solvent Selection B: B1  
Seal Wash: 30.0 min  
Switch 1: No Change  
Switch 2: No Change  
Switch 3: No Change  
Chart Out 1: System Pressure  
Chart Out 2: %B  
Run Events: No  
[Analytical Gradient Table]  
Time(min) Flow Rate(uL/min) %A %B Curve  
1. Initial 1.000 50.0 50.0  
2. 5.00 1.000 50.0 50.0 6  
Analytical Low Pressure Limit: 0 psi  
Analytical High Pressure Limit: 10000 psi  
Trapping Low Pressure Limit: 0 psi  
Trapping High Pressure Limit: 10000 psi  
Flow Rate A Data Channel: Yes  
Flow Rate B Data Channel: Yes  
Solvent Name A: Water  
Solvent Name B: Acetonitrile  
Comment:  
System Pressure Data Channel: Yes  
Flow Rate Data Channel: Yes  
%A Data Channel: Yes  
%B Data Channel: Yes  
Primary A Pressure Data Channel: No  
Accumulator A Pressure Data Channel: No  
Primary B Pressure Data Channel: No  
Accumulator B Pressure Data Channel: No  
Degasser Pressure Data Channel: No  
[Trapping Gradient Table]  
Time(min) Flow Rate(uL/min) %A %B Curve  
1. Initial 5.000 99.0 1.0  
2. 15.00 5.000 99.0 1.0 6  
Percentage of first solvent(B): 100.0  
Percentage of first solvent(A): 100.0  
Used for Load Ahead: No  
Sample Loading Time: 15.00 min  
Trapping Pump: No  
Disable Flow Ramps: No  
SM Multiload: No

4 -----  
Trap Valve Manager  
Run Time: 5.00 min  
ApplicationMode: ApplicationMode\_2  
Comment:  
Analytical Left Valve Position: No Change  
Analytical Right Valve Position: Position 1  
Trapping Left Valve Position: No Change  
Trapping Right Valve Position: Position 2  
Target Column Temperature: 60.0 C  
Target CM-Aux A Upper Temperature: Off C  
Target CM-Aux A Lower Temperature: Off C  
Target CM-Aux B Upper Temperature: Off C  
Target CM-Aux B Lower Temperature: Off C  
Temperature Alarm Band: 10.0 C  
Left Valve Position Data Channel: No  
Right Valve Position Data Channel: No  
Column Temperature Data Channel: Yes

Method File: D:\2020GYUMIN.PRO\Acquidb\210808\_trap  
Last Modified: Sunday, August 08, 2021 13:22:27 Korea Standard Time

Printed: Thursday, December 30, 2021 16:30:53 Korea Standard Time

---

CM-Aux A Upper Temperature Data Channel: No  
CM-Aux A Lower Temperature Data Channel: No  
CM-Aux B Upper Temperature Data Channel: No  
CM-Aux B Lower Temperature Data Channel: No  
Method Comments...  
Comment:

#### Waters Acquity Autosampler Method

Run Time: 10.00 min  
Comment:  
Load Ahead: Disabled  
Injection Mode: Partial Loop  
Loop Offline: Disable  
Weak Wash Solvent Name: Water  
Weak Wash Volume: 600 uL  
Strong Wash Solvent Name: Acetonitrile  
Strong Wash Volume: 200 uL  
Target Column Temperature: Off C  
Column Temperature Alarm Band: Disabled  
Target Sample Temperature: 8.0 C  
Sample Temperature Alarm Band: Disabled  
Full Loop Overfill Factor: Automatic  
Syringe Draw Rate: Automatic  
Needle Placement: Automatic  
Pre-Aspirate Air Gap: Automatic  
Post-Aspirate Air Gap: Automatic  
Column Temperature Data Channel: No  
Ambient Temperature Data Channel: Yes  
Sample Temperature Data Channel: Yes  
Sample Organizer Temperature Data Channel: No  
Sample Pressure Data Channel: No  
Switch 1: No Change  
Switch 2: No Change  
Switch 3: No Change  
Switch 4: No Change  
Chart Out: Sample Pressure  
Sample Temp Alarm: Disabled  
Column Temp Alarm: Disabled  
Run Events: No  
Needle Overfill Flush: Automatic  
No Injection: Disabled  
iKey Cool Down: 2.0  
End Of Report
